# Supplementary material for: Fluorescence turn-on hairpin-probe PCR
Source: Royal Society of Chemistry journal article supplement (doi:10.1039/c6cc08947j), 2017-01-01
Supplement: c6cc08947j1.pdf [file c6cc08947j1.pdf]

**Supporting Information**  
**for**

**Fluorescence Turn-on Hairpin-Probe PCR**

Fumie Takei<sup>†</sup> and Kazuhiko Nakatani<sup>‡\*</sup>

<sup>†</sup>National Defense Medical College 3-2 Namiki, Tokorozawa, Saitama 359-8513, Japan;  
Fax: (+81) 4-2996-5181; E-mail: ft-sakamot@ndmc.ac.jp

<sup>‡</sup>The Institute of Scientific and Industrial Research, Osaka University 8-1 Mihogaoka,  
Ibaraki, Osaka 567-0047, Japan; Fax: (+81) 6-6879-8459; E-mail:  
nakatani@sanken.osaka-u.ac.jp

**Contents**

|                                                                                 |        |
|---------------------------------------------------------------------------------|--------|
| 1. <b>Fig. S1</b> Native PAGE analysis of PCR solutions using Hpro w/wo tag(0). | page 2 |
| 2. Experimental section                                                         | page 3 |

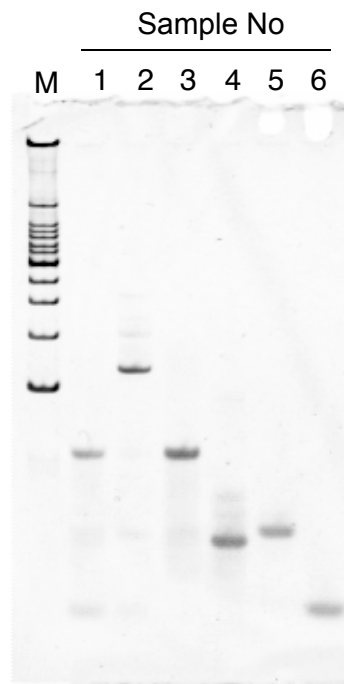

**Fig. S1** Native PAGE analysis of PCR solutions using Hpro w/wo tag(0). Sample No 1: 0 cycle of PCR solution, No 2: 40 cycle of PCR solution. No 3 to No 6 were solutions of primers w/wo Hpro. No 3: Hpro with tag(0), No 4: tag(0), No 5: Hpro. No 6: M13M3. The PCR was done Taq PCR master Mix Kit (QIAGEN).

## Experimental Section

### Measurement of melting temperature ( $T_m$ )

All melting temperatures ( $T_m$ ) of the Hpro (5  $\mu$ M, final duplex concentration) w/wo tag-primer (5  $\mu$ M, final concentration) were determined in 10 mM cacodylate (pH 7.0) containing 100 mM NaCl with DANP (20  $\mu$ M). Absorbance profiles were measured at 260 nm using a Shimadzu UV-2550 spectrometer equipped with a temperature controller using a 1-cm path length cell. The absorbance of the samples was monitored at 260 nm from 2 to 90 °C with a heating rate of 1 °C/min.

### PCR on pUC18 plasmid

PCR on the pUC18 plasmid was performed with a forward primer, M13M3 (5'-d(GTT GTA AAA CGA CGG CCA GT)-3'), and a reverse primer with tag and Hpro. The amplification reaction was carried out with 0.5  $\mu$ M of each primer, 0.5  $\mu$ M of probe, 5  $\mu$ M of DANP, Taq PCR Master Mix Kit (QIAGEN), and pUC18 (100 pg/ $\mu$ L) in a final volume of 40  $\mu$ L. The amplification protocol was 95 °C for 1 min, and 40 cycles of 95 °C for 10 s, 55 °C for 30 s, and 72 °C for 30 s on a TP600 PCR Thermal Cycler (TAKARA). All PCR products were analyzed by native PAGE (8% polyacrylamide gel stained with SYBR gold). Fluorescence intensities of PCR solutions after certain cycles were measured on a BERTHOLD Mithras LB 940 microplate reader with 400 nm excitation and 450 nm emission filters.
